# Supplementary material
Source: PubMed Central journal article supplement (PMC5192124)
Supplement: AAC.00899-16_zac001175822s1.pdf [file AAC.00899-16_zac001175822s1.pdf]

1 **Supplementary Table 1: primers and conditions to genotype *CYP2C19*.**

| <i>CYP2C19</i><br>region | Forward Primer                           | Reverse Primer                             | Annealing<br>T <sup>a</sup> | Expected<br>fragment |
|--------------------------|------------------------------------------|--------------------------------------------|-----------------------------|----------------------|
| Promoter part 1          | 5'- ACATTGTGCAATTGTGT<br>CTTAAC -3'      | 5'- CATTAAATAGAACCACT<br>TATTTATCTAAGG -3' | 55°C                        | 563 bp               |
| Promoter part 2          | 5'- GGCTGTTTTTCCTTAGAT<br>AAATAAGTG -3'  | 5'- CCAGTTGGGAATTTATG<br>ATTTAACG -3'      | 60°C                        | 600 pb               |
| Promoter part 3          | 5'-GCCATTTCCGTTAAATC<br>ATAAATTCC-3'     | 5'- CTTGTTAAGACAACCGT<br>GAGC -3'          | 60°C                        | 399 pb               |
| Exon 1                   | 5'- TATTACCAATACCTAGG<br>CTTCAACC -3'    | 5'- TGTAACATTGTACCTCT<br>AGGGATATAC -3'    | 60°C                        | 522 pb               |
| Exon 2-3                 | 5'- TGAATCTAAGTCAGGCT<br>TAGTAAATG -3'   | 5'- GGAGAGCAGTCCAGAA<br>AGG -3'            | 60°C                        | 601 pb               |
| Exon 4                   | 5'- GGCTGTAATTGTTAATT<br>CGAGATTAATG -3' | 5'- GGCTGTCTAGGCAAGA<br>CTG -3'            | 60°C                        | 481 pb               |
| Exon 5                   | 5'- AACCAGAGCTTGGCAT<br>ATTG -3'         | 5'- GCTTACTGGATATTCAT<br>GCATAC -3'        | 60°C                        | 405 pb               |
| Exon 6                   | 5'- CTCTCTCACCGCTCCT<br>ATTC -3'         | 5'- GCACCAGGCCAGGATA<br>TTC -3'            | 60°C                        | 468 pb               |

|               |                                     |                                         |      |        |
|---------------|-------------------------------------|-----------------------------------------|------|--------|
| Exon 7        | 5'- GTACCCCTGAATTGCT<br>AGAAC -3'   | 5'- CCAGTGATGGTAGAGG<br>GTAAG -3'       | 60°C | 345 pb |
| Exon 8        | 5'- TGCTACTGGCCTTAAG<br>CTC -3'     | 5'- GGCACATGTAAGTTCC<br>AACTG -3'       | 60°C | 400 pb |
| Exon 9        | 5'- TTCTGTCTGTGCCAGT<br>TATAGAG -3' | 5'- GCATCACAGATAGTGA<br>AATTTG -3'      | 53°C | 351 pb |
| 3' UTR part 1 | 5'- CAGATGGTCTGGCTG<br>CTC -3'      | 5'- CTTTCAAATCCAATCCT<br>CATGTAAC -3'   | 60°C | 527 pb |
| 3' UTR part 2 | 5'- GCTATTTTGGCTGAGC<br>ATTACC -3'  | 5'- GGCACAGTGTCTCACT<br>CC -3'          | 60°C | 449 pb |
| 3' UTR part 3 | 5'- CTGCTGACCTCCTGA<br>TCTG -3'     | 5'- CCCTGGTAATTCTTCTT<br>AGAAATTTTG -3' | 60°C | 578 pb |

3 **Supplementary Table 1a: Assays on demand included in the study.**

| Gene allele       | dbSNP_rs   | ABI-Assay_ID  |
|-------------------|------------|---------------|
| <i>CYP2C19*2</i>  | rs4244285  | C_25986767_70 |
| <i>CYP2C19*17</i> | rs12248560 | C_469857_10   |
| <i>CYP3A5*3</i>   | rs776746   | C_26201809_30 |
| <i>UGT1A4*2</i>   | rs6755571  | C_25957120_10 |

4

5 **Supplementary Table 1c. CYP2C19 re-sequencing results in 6 subjects with extreme plasma rilpivirine levels (very low or very high**  
6 **plasma concentrations).**

|         | CYP2C19               |                       | Promoter                |                      | Exon 1     |           | Exon 2                             |                   | Intron                       |                             | Exon 5      |             | Intron                 |                                            | Exon 7                 |                       | Intron                      |                                  |           |                   |        |
|---------|-----------------------|-----------------------|-------------------------|----------------------|------------|-----------|------------------------------------|-------------------|------------------------------|-----------------------------|-------------|-------------|------------------------|--------------------------------------------|------------------------|-----------------------|-----------------------------|----------------------------------|-----------|-------------------|--------|
| Subject | C>T g.-1418 rs3814637 | T>G g.-889 rs11568732 | <b>rs12248560 (*17)</b> | <b>C&gt;T g.-806</b> | rs4986894  | T>C g.-98 | <b>rs28399504 (*4)<sup>a</sup></b> | <b>A&gt;G g.1</b> | C>T g.99 P33P rs17885098(*1) | G>C g.12460 E92E rs17878459 | rs377056911 | G>C g.12644 | A>G g.12662 rs12769205 | <b>G&gt;A g.19154 P227P rs4244285 (*2)</b> | T>C g.57678 rs28399511 | C>T g.57740 rs4417205 | C>T g.80160 V330V rs3758580 | A>G g.80161 I331V rs3758581 (*1) | rs4917623 | T>C g.87106       | Result |
| #1      | Ref                   | Ref                   | Ref                     | Het                  | <b>Het</b> | Hom       | Ref                                | Het               | Het                          | <b>Het</b>                  | Ref         | Het         | Het                    | Hom                                        | Het                    | Het                   | Hom                         | Het                              | Het       | *2/*4 (LOF/LOF)   |        |
| #2      | Ref                   | Ref                   | Ref                     | Het                  | Ref        | Hom       | Het                                | Ref               | Het                          | <b>Het</b>                  | Ref         | Het         | Het                    | Hom                                        | Het                    | Het                   | Hom                         | Het                              | Het       | *1/*2 (Ref/LOF)   |        |
| #3      | Het                   | Het                   | <b>Het</b>              | Ref                  | Ref        | Het       | Ref                                | Ref               | Ref                          | Ref                         | Ref         | Het         | Ref                    | Ref                                        | Het                    | Ref                   | Het                         | Ref                              | Ref       | *1/*17 (Ref/GOF)  |        |
| #4      | Ref                   | Ref                   | <b>Het</b>              | Ref                  | Ref        | Hom       | Ref                                | Ref               | Ref                          | Ref                         | Ref         | Ref         | Ref                    | Ref                                        | Ref                    | Hom                   | Het                         | Het                              | Het       | *1/*17 (Ref/GOF)  |        |
| #5      | Ref                   | Ref                   | Ref                     | Ref                  | Ref        | Hom       | Ref                                | Ref               | Ref                          | Ref                         | Ref         | Ref         | Ref                    | Ref                                        | Ref                    | Hom                   | Hom                         | Hom                              | Hom       | *1/*1 (Ref)       |        |
| #6      | Ref                   | Ref                   | <b>Hom</b>              | Ref                  | Ref        | Hom       | Ref                                | Ref               | Ref                          | Ref                         | Ref         | Ref         | Ref                    | Ref                                        | Ref                    | Hom                   | Ref                         | Ref                              | Ref       | *17/*17 (Hom-GOF) |        |

7 Ref: homozygous for the common allele; Het: heterozygous; Hom: homozygous for the rare allele; LOF: loss of function allele; GOF: gain of  
8 function allele. In black we highlighted the single nucleotide polymorphism marker of the allele. <sup>a</sup> Codifies for a GTG initiation codon with  
9 consequent loss of enzyme function (14, 31). Study participants were classified according to the CYP Allele Nomenclature Committee  
10 (<http://www.cypalleles.ki.se/>).
